# 1 Precise excitation-inhibition balance controls gain 2 and timing in the hippocampus

3 Aanchal Bhatia<sup>1</sup>, Sahil Moza<sup>1</sup>, Upinder S. Bhalla\*

4 National Centre for Biological Sciences, Tata Institute of Fundamental Research, Bellary Road,  
5 Bangalore 560065 India

6

7 <sup>1</sup>Equal contribution

8 \* Corresponding author (bhalla@ncbs.res.in)

9

## 10 ABSTRACT

11 Balanced excitation and inhibition contributes to clamping excitability, input gating, and dynamic  
12 range expansion in many brain circuits. However, it is unknown if the balancing mechanism  
13 operates at the level of networks, ensembles or individual projections. We optogenetically  
14 stimulated hippocampal CA3 neurons in hundreds of different combinations, and monitored CA1  
15 neuron responses in mouse brain slices. We observed that all arbitrary input combinations from  
16 CA3, from tens of synapses to the order of single synapses, elicited excitation followed by tightly  
17 proportional inhibition. CA1 neurons summed these complementary inputs and exhibited gain  
18 control in the form of subthreshold divisive normalization (SDN). Biophysically, SDN emerged  
19 because inhibitory onset advanced toward excitatory onset with increasing input strength. This  
20 caused clipping of peak amplitudes and faster peak times, resulting in shared input information

21 coding between the two. Our results suggest that SDN may be a general gain and timing control  
22 mechanism in balanced feedforward networks.

## 23 INTRODUCTION

24 Excitation and Inhibition (E and I) are normally closely balanced throughout the brain<sup>1-4</sup>. This  
25 EI balance implies that the ratio of excitatory and inhibitory inputs to a cell remains invariant<sup>5</sup>.  
26 Clinically, imbalance of excitation and inhibition is linked with several pathologies, including  
27 epilepsy, autism spectrum disorders and schizophrenia<sup>6</sup>. Computationally, individual neurons  
28 integrate incoming excitation and inhibition to perform subtraction, division, and normalization of  
29 inputs<sup>7,8</sup>. This has functional consequences such as preventing runaway excitation, gain  
30 control<sup>9</sup>, maximizing sensitivity to various stimuli, and attentional modulation<sup>10</sup>.

31  
32 Strong EI correlations have been seen in several brain regions in response to various  
33 stimuli, for instance, series of tones in auditory cortex<sup>2,11,12</sup>, whisker stimulation in  
34 somatosensory cortex<sup>13</sup>, during cortical up states in vitro<sup>14</sup> and in vivo<sup>15</sup>, during gamma  
35 oscillations in vitro and in vivo<sup>4</sup>, and during spontaneous activity<sup>3</sup>. However, the presynaptic  
36 origin of balance is not well understood. It remains to be established if this balance results from  
37 a single presynaptic population, summation of multiple presynaptic populations, or from complex  
38 temporal dynamics of multiple presynaptic layers.

39  
40 In the context of temporal dynamics and presynaptic granularity two key classifications of EI  
41 balance have been theoretically explored: 'loose' vs. 'tight'<sup>16</sup> (in the time domain), and 'global'  
42 vs. 'detailed'<sup>17</sup> (in the domain of granularity of input combinations). Neurons in loosely balanced  
43 EI networks are balanced only on slow timescales (~100 ms), leading to chaotic dynamics and  
44 unreliable spike times<sup>16,18,19</sup>. Conversely, neurons in tightly balanced EI networks receive input

45 balanced at fast (<10 ms) timescales, and have reproducible spike times, making them good  
46 temporal coders<sup>16</sup>.

47

48 In the domain of granularity of input, there is a distinction between global and detailed  
49 balance. Global balance implies that neurons exhibit EI balance on average (for example,  
50 responses averaged over sensory inputs), whereas detailed balance implies that all subsets of  
51 input neurons elicit balanced responses<sup>17</sup>. Based on the latter, neurons can effectively gate  
52 several inputs by reporting I/E ratio imbalances on arbitrary subsets of inputs, constituting an  
53 instantaneous information channel<sup>17,20</sup>. When detailed balance is also temporally tight, it is  
54 referred to as precise balance<sup>21</sup>.

55

56 In this study we address two key open questions in the field. First, does EI balance arise  
57 even from single presynaptic networks, and if so, at what granularity of network subsets do  
58 postsynaptic cells experience balanced excitation and inhibition? Second, how do excitation  
59 and inhibition integrate to encode and communicate information at the postsynaptic neuron? We  
60 addressed these questions *in vitro*, to isolate the hippocampal network from background activity  
61 and to precisely control the stimulus. We stimulated channelrhodopsin-2 (ChR2) expressing  
62 CA3 neurons with tens to hundreds of optical patterns, and measured responses in CA1. We  
63 found that all randomly chosen subsets of CA3 neurons provided tightly coupled excitatory and  
64 feedforward inhibitory inputs to CA1 cells, thus, for the first time demonstrating precise  
65 balance<sup>21</sup> in the brain. We further examined the arithmetic form of the integration performed by  
66 this tightly balanced feedforward inhibitory network. Surprisingly, we found that integration of  
67 excitation and feedforward inhibition leads to divisive normalization at subthreshold potentials.  
68 Moreover, this novel gain control operation encodes input information in both amplitude and  
69 timing of the CA1 response.

## 70 RESULTS

### 71 Patterned optical stimuli in CA3 elicit subthreshold responses in CA1

72

73 To provide a wide range of non-overlapping stimuli, we projected patterned optical  
74 stimuli onto channelrhodopsin-2 (ChR2) expressing CA3 neurons in acute hippocampal slices.  
75 We used CA3-cre mice to achieve CA3-specific localization of ChR2 upon injection of a Lox-  
76 ChR2 virus (**Fig. 1a, Methods**). We used a Digital Micromirror Device (DMD) projector  
77 (**Methods, Supplementary Fig. 1**) to generate spatiotemporal optical patterns in the form of a  
78 grid of several 16 $\mu$ m x 16 $\mu$ m squares, each square approximating the size of a CA3 soma<sup>22</sup>  
79 (**Fig. 1d**). This grid was centered at the CA3 cell body layer, and extended to the dendritic layer  
80 (**Fig. 1a**). Each optical pattern consisted of 1 to 9 such randomly chosen grid squares,  
81 presented to CA3 cells as stimulus, at an inter-stimulus interval of 3 seconds (**Fig. 1a, 1d**,  
82 **Methods**). In a typical experiment, several randomly chosen stimulus patterns with different  
83 number of input squares were delivered to CA3, in 3 successive repeats. We first characterized  
84 how CA3 responded to the grid stimulation (**Fig. 1b,e,f,g**). We confirmed that CA3 neurons fired  
85 reliably with a <2ms jitter, calculated as the standard deviation of the time of first spike (**Fig. 1f**)  
86 (n = 8 CA3 cells, inputs = 52, median = 0.44 ms, N = 1 to 9 squares). No desensitization  
87 occurred during the timeframe of an experiment, and the probability of spiking remained  
88 constant between the 3 repeats (**Fig. 1g**) (n = 7 CA3 cells, N = 1 to 9 squares). Thus, we could  
89 stimulate CA3 with hundreds of distinct optical stimuli in each experiment.

90 We then recorded postsynaptic potentials (PSPs) evoked at patched CA1 neurons while  
91 optically stimulating CA3 cells (**Fig. 1c,h,i,j**). A wide range of stimulus positions in CA3 excited  
92 CA1 neurons (**Fig. 1c**). Stimulation of CA3 elicited excitation and feedforward inhibition at CA1  
93 (**Fig. 1a, Supplementary Fig. 3**). Most stimuli elicited subthreshold responses (N = 1 to 9

94 squares). Action potentials occurred in only 0.98% of trials (18,668 trials, from 38 cells, N = 1 to  
95 9 squares). This helped rule out any significant feedback inhibition from CA1 interneurons for all  
96 our experiments. Restriction of ChR2 to CA3 pyramidal cells, coupled with the fact that ~99% of  
97 all recorded CA1 responses were subthreshold, ensured that the recorded inhibition was largely  
98 feedforward (disynaptic)(**Fig. 1a**). Responses to the same 1-square stimulus were consistent,  
99 84.74% responses showed less than 0.5 variance by mean (695 stimuli, 3 repeats each, n = 28  
100 cells, N = 1 square) (**Fig. 1i**). Notably, the distribution of all 1 square responses had a mode at  
101 0.25 mV, which is close to previous reports of a 0.2mV somatic response of single synapses in  
102 CA1 neurons<sup>23</sup>(8845 trials, n = 38 cells, N = 1 square) (**Fig. 1j**).

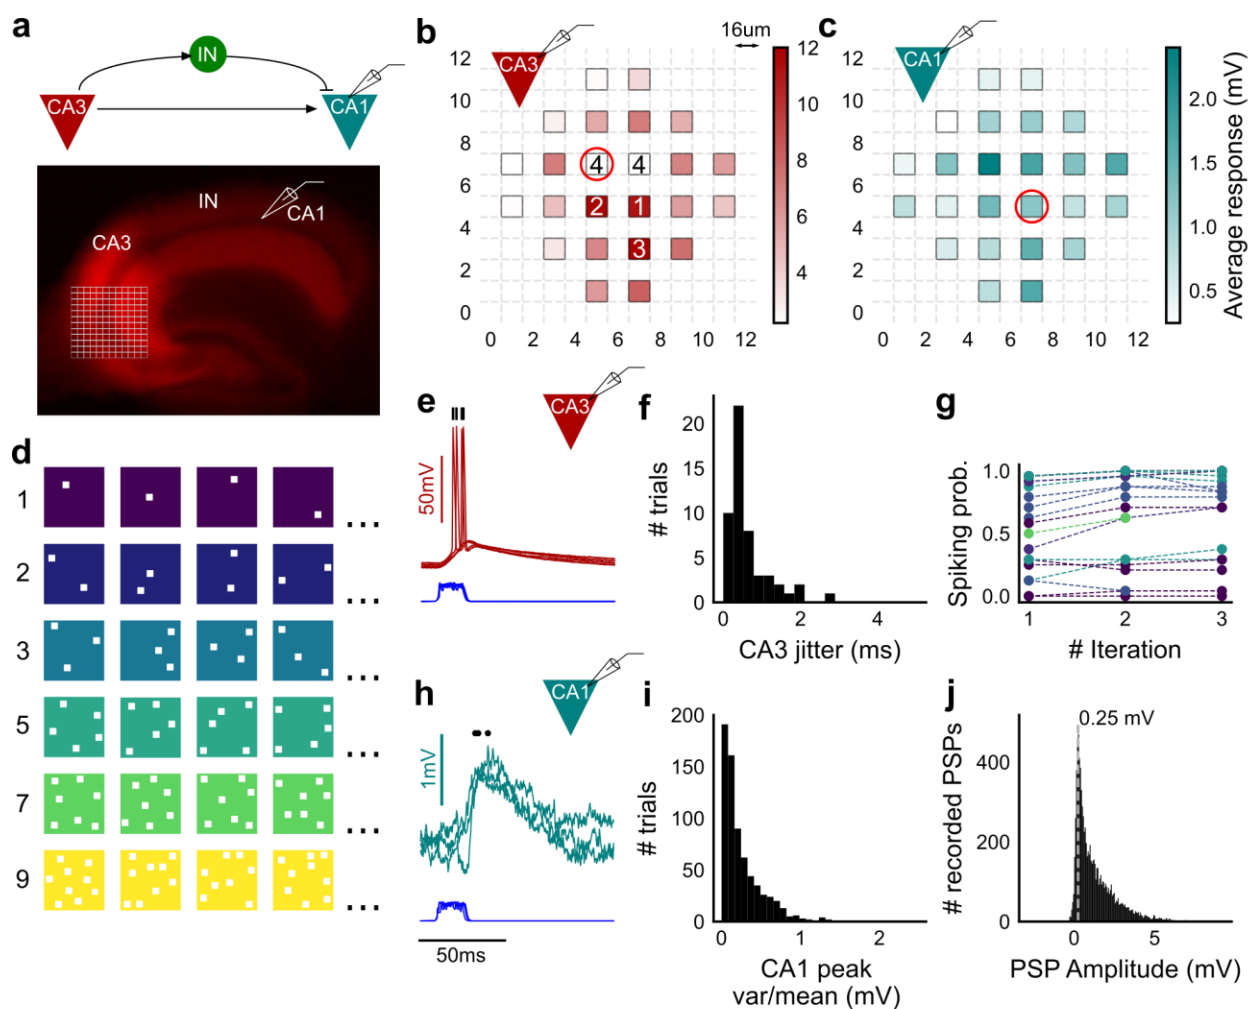

103

104

105 **Figure 1: Delivering hundreds of CA3 input combinations to each CA1 neuron using patterned**  
 106 **optical stimulation**

107 (a) Top, schematic of the CA3-CA1 circuit with direct excitation and feedforward inhibition from CA3 to  
 108 CA1. Bottom, image of a hippocampus slice expressing ChR2-tdTomato (red) in CA3 in a Cre-dependent  
 109 manner. In a typical experiment, the optical stimulation grid (not drawn to scale) was centered at the CA3  
 110 cell body layer and CA1 neurons were patched.

111 (b) Heat map of CA3 neuron responses with 1 grid square active at a time. A CA3 neuron was patched  
 112 and optically stimulated, in random temporal order, on the grid locations marked with a gray boundary.  
 113 There were 24 such 1 square stimuli in the stimulus set. This cell spiked in response to 5 of the squares,  
 114 marked with numbers inside, which were inferred to be closest to the cell body. Numbers in grid squares

115 represent the count of trials (out of a total of 4 trials) in which a spike occurred. Color in grid squares  
116 represents peak subthreshold membrane potential change from baseline, averaged over trials when a  
117 spike did not occur. Locations where the cell spiked all 4 times are in white due to lack of subthreshold  
118 depolarizations.

119 (c) Heat map of CA1 responses while CA3 neurons were being stimulated by optical grid with 1 square  
120 active at a time. Colormap represents the peak subthreshold membrane potential, averaged over 3  
121 repeats.

122 (d) Schematic of patterned optical stimuli used for stimulating CA3. Examples of input combinations of N-  
123 square stimuli (in columns), where N could be 1, 2, 3, 5, 7 or 9 (in rows).

124 (e) Spikes in response to 4 repeats for the square marked with a red circle, in **b**. Spike times are marked  
125 with a black tick, showing variability in peak times due to optical stimulation. Blue trace at the bottom  
126 marks the stimulus duration, as measured by a photodiode.

127 (f) Distribution of jitter in spike timing (SD) for all squares for all CA3 cells (n=8 cells).

128 (g) Probability of spiking of all CA3 cells tracked over successive repeats within a stimulus epoch of a  
129 single recording session. Randomization of the stimulus pattern prevented desensitization of the ChR2  
130 expressing cell. Probability was calculated as the fraction of times a spike happened for a given repeat of  
131 all stimuli presented within the epoch. Circles colored as in **d**, depict probability of a spike for one  
132 presentation of an N-square stimulus set (n = 7 cells, epochs = 24). Connecting lines track the same input  
133 over 3 repeats.

134 (h) PSPs in response to 3 repeats for the square marked with a red circle in **c**. Peak times are marked  
135 with an asterisk. Blue trace at the bottom marks the stimulus duration, as measured by a photodiode.

136 (i) Distribution of peak PSP amplitude variability (variance/mean) for all 1-square responses from all cells.  
137 (n = 28 cells, stimuli = 695)

138 (j) Histogram of peak amplitudes of all PSPs elicited by all 1-square stimuli, over all CA1 cells (n =38  
139 cells, trials = 8845). Gray dotted line represents the mode of the distribution.

140

141 **Excitation and inhibition are tightly balanced for all arbitrarily chosen CA3 inputs**  
142 **to a CA1 cell**

143

144 To examine the relationship between excitation and inhibition, we voltage clamped CA1  
145 neurons, first at the inhibitory (-70 mV) and then at the excitatory (0 mV) reversal potential to  
146 record Excitatory and Inhibitory Post Synaptic Currents (EPSCs and IPSCs) respectively. We  
147 first presented 5 different patterns of 5 squares each, at both of these potentials, and recorded  
148 EPSCs and IPSCs. We found strong proportionality between excitation and inhibition for every  
149 stimulus pattern (**Fig. 1d, 2a, b, c**). This suggested that inputs from even random groups of CA3  
150 neurons may be balanced at CA1. Repeats with the same stimulus pattern gave consistent  
151 responses, but different patterns evoked different responses (**Fig. 2a**). This indicated that the  
152 optically-driven stimuli were able to reliably activate different subsets of synaptic inputs on the  
153 target neuron. Next, we asked, in what range of input strengths does random input yield  
154 balance? We presented 5 different patterns for each of 1, 2, 3, 5, 7 or 9 square combinations at  
155 both recording potentials. Surprisingly, all stimuli to a cell elicited proportional excitatory and  
156 inhibitory responses, irrespective of response amplitude (**Fig. 2b, c**) ( $n = 13$  CA1 cells, area  
157 under curve, mean  $R^2 = 0.89 \pm 0.06$  SD, **Supplementary Figure 2**). Given that the mode of  
158 single-square responses was  $\sim 0.25$  mV, close to single synapse PSP estimates<sup>23</sup> (**Fig. 1j**), we  
159 estimate that the granularity of the balance may be of the order of a single synapse. The slope  
160 of the regression line through all stimulus-averaged responses for a CA1 cell was used to  
161 calculate the Inhibition/Excitation (I/E) ratio for the cell. IPSC/EPSC ratio will be here onwards  
162 referred to as I/E ratio, unless explicitly mentioned otherwise. This ratio was typically between 2  
163 and 5 (**Fig. 2f**). The high  $R^2$  values for all cells showed tight proportionality for all stimuli (**Fig.**  
164 **2g**). The  $R^2$  also remained roughly the same for increasing numbers of spots, again showing  
165 that they were not affected by the number of stimulus squares presented (**Fig. 2d,e**). While



166 feedforward inhibition is expected to increase with excitation, convergence of I/E ratios for  
167 randomly chosen inputs to a cell to a single number was unexpected. Overall, we found a  
168 stimulus-invariant proportionality of excitation and inhibition for any randomly selected input,  
169 over a large range of stimulus strengths, suggesting that there is detailed balance<sup>17</sup> in the CA3-  
170 CA1 circuit. Since balanced inhibition followed excitation within a few milliseconds(**Fig. 6f,g**), we  
171 concluded that the CA3-CA1 feedforward circuit exhibits precise (both detailed and tight)  
172 balance<sup>21</sup>.

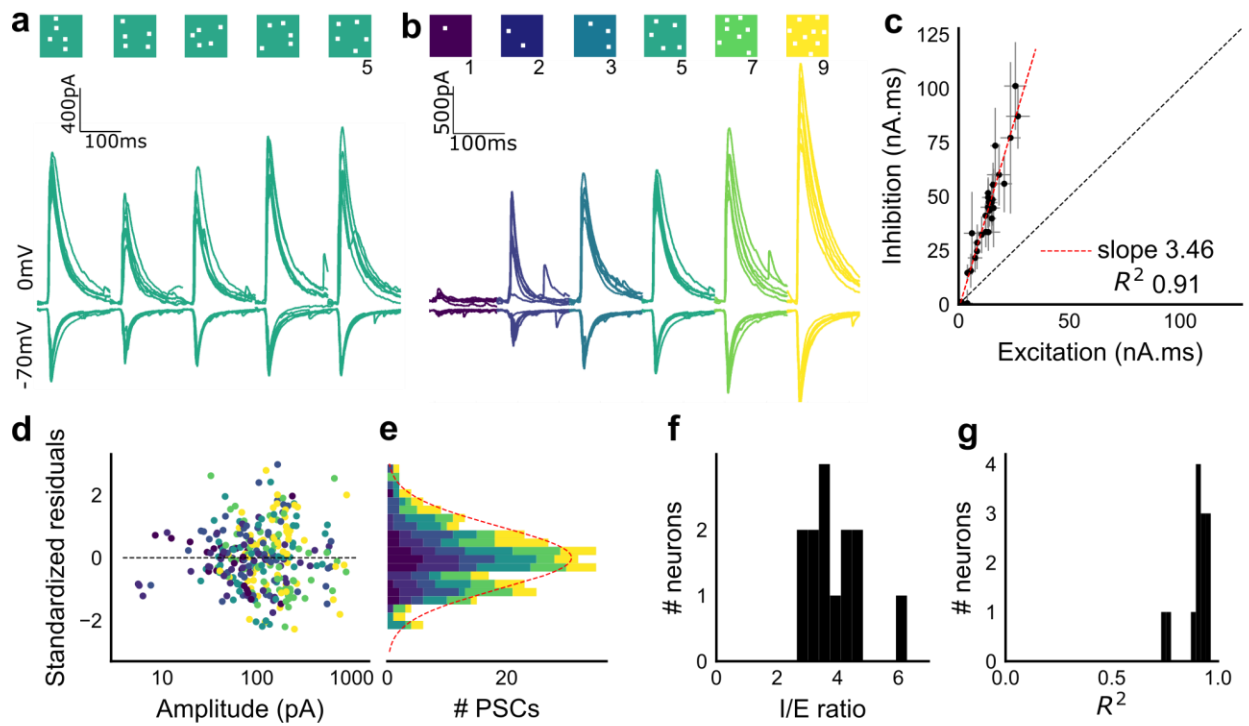

173

174

175 **Figure 2: Excitation and inhibition are tightly balanced for all stimuli to a CA1 cell**

176 (a) Monosynaptic excitatory postsynaptic currents (EPSCs, at -70mV) and disynaptic inhibitory

177 postsynaptic currents (IPSCs, at 0mV) in response to 5 different stimulus combinations of 5 squares

178 each. All combinations show proportional excitatory and inhibitory currents over 6 repeats. Top:

179 schematic of 5 square stimuli.

180 (b) Proportional EPSCs and IPSCs in response to 6 repeats of 1 combination each, from 1 square to 9

181 square stimulus sets, for the same cell as in a. Top, schematic of the stimuli.

182 (c) Area under the curve for EPSC and IPSC responses, obtained by averaging over 6 repeats, plotted

183 against each other for all stimuli to the cell in a, b. Error bars represent SD over repeats.

184 (d,e) Plot of residuals for all inputs (colored by N-square as shown in b) of all cells, normalized by their

185 standard deviation, are symmetrically distributed across the regression line at 0. The normalized residuals

186 are normally distributed, as shown in e, overlaid with standard normal distribution (red). All responses lie

187 within two standard deviations, showing absence of outliers. Different N-squares are equally distributed in  
188 the different bins in  $\mathbf{e}$ , showing that value of N did not affect the spread of the response.  
189 (f) Summary of I/E ratios for all cells ( $n = 13$  cells).  
190 (g) Summary for all cells of  $R^2$  values of linear regression fits through all points. Note that 11 out of 13  
191 cells had  $R^2$  greater than 0.9, implying strong proportionality.

## 192 **Combinatorial CA3 inputs sum sublinearly at CA1**

193

194 We next asked how CA3 inputs, that lead to balanced excitatory and feedforward  
195 inhibitory conductances, transform into membrane potential change at CA1 neurons. Based on  
196 anatomical studies, CA3 projections are likely to arrive in a distributed manner over a wide  
197 region of the dendritic tree of CA1 pyramidal neuron<sup>24</sup> (**Fig. 3a**). While pairwise summation at  
198 CA1 has been shown to be largely linear in absence of inhibition<sup>25</sup>, the degree of heterogeneity  
199 of summation in response to distributed excitatory and inhibitory synaptic inputs is not well  
200 understood (except, see <sup>26</sup>). To avoid biases that may arise from a single response measure  
201 during input integration<sup>27</sup>, we examined PSPs using four different measures (**Fig. 3c**). These  
202 were peak amplitude, area under curve (AUC), average membrane potential and area under  
203 curve till peak (**Fig. 3c**).

204

205 We looked at input integration by presenting stimulus sets of 5 input squares to a given  
206 cell, with each stimulus set ranging from 24 to 225 combinations of inputs. We also recorded the  
207 responses to all squares of the grid individually (1 square input). The 1 square PSP response  
208 amplitude with inhibition intact (control) was not distinguishable from that with inhibition blocked  
209 (GABA<sub>A</sub>zine) (**Methods, Supplementary Fig 3**). The ‘observed’ response for a given square  
210 combination was plotted against the ‘expected’ response, obtained by linearly summing  
211 responses of the individual squares constituting that combination (**Fig. 3b, d**). In the absence of  
212 inhibition, a multi-square combination of inputs would elicit the same response as the sum of the  
213 responses to the individual squares (dotted line, **Fig. 3d**). **Figure 3e** shows responses of a  
214 single cell stimulated with 126 distinct 5-square combinations. The ‘observed’ response was  
215 sublinear as compared to the ‘expected’ summed response, for most stimuli (**Fig. 3e**). For all  
216 the four measures in **3c**, CA3 inputs summed sublinearly at CA1 (**Fig. 3e, Supplementary Fig**  
217 **3**). The sublinear summation suggested that inhibition divisively scales excitation, which was

218 intuitive, given that excitatory and inhibitory conductances were proportional for all stimuli. For  
219 all responses measured over all cells, 93.35% responses were individually sublinear, with  
220 distribution having mean  $0.57 \pm 0.31$  (SD) (**Fig. 3f**). The slope of the regression line, which  
221 indicated the extent of sublinearity, varied between cells, with mean  $0.38 \pm 0.22$  (SD) ( $n = 33$   
222 cells) (**Fig. 3g**).

223 Thus, we found that the CA3-CA1 network exhibits sublinear summation over a large  
224 number of inputs.

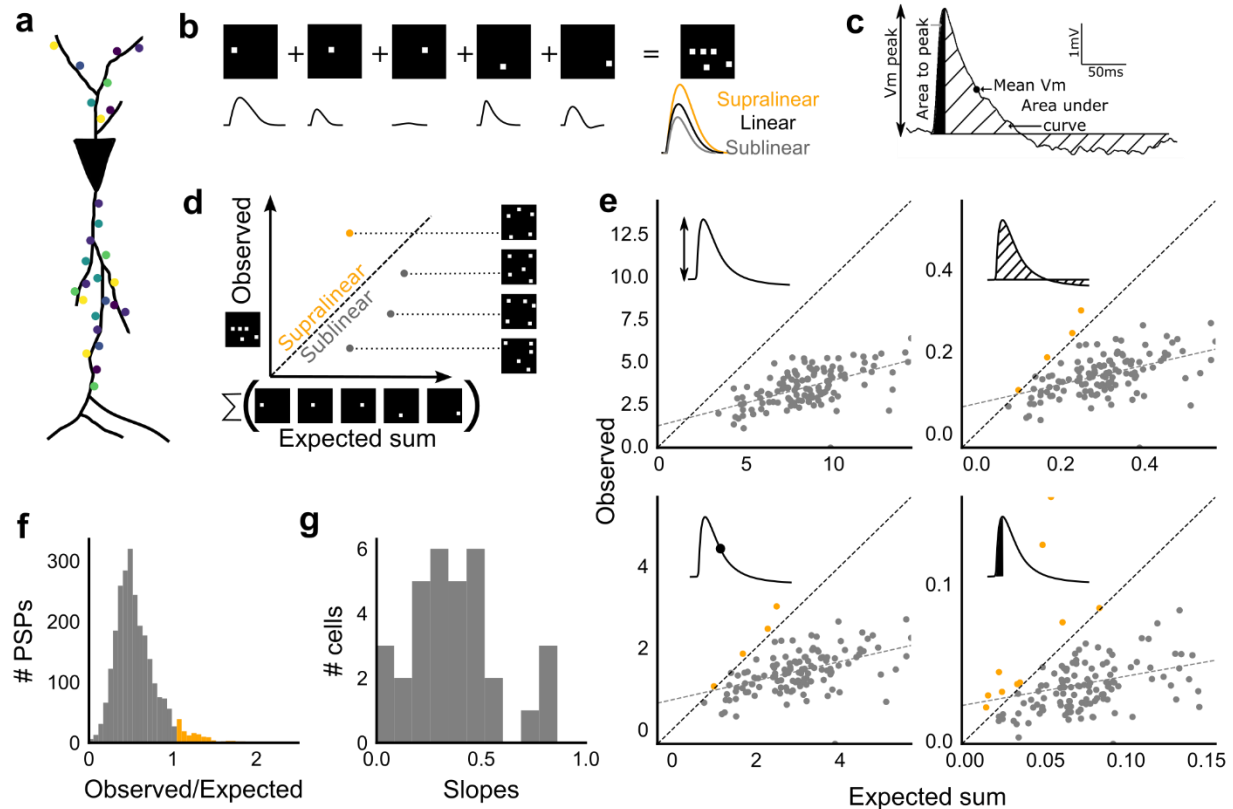

225

226

227 **Figure 3: Excitatory and feed-forward inhibitory inputs from CA3 integrate sublinearly at CA1**

228 (a) Schematic of a neuron receiving synaptic input distributed over its dendritic tree.

229 (b) Schematic of input integration. Top, five 1-square stimuli presented individually, and a single 5-square  
 230 stimulus comprising of the same squares. Bottom, PSPs elicited as a response to these stimuli. 5-square  
 231 PSP can be larger (supralinear, orange), equal (linear, black), or smaller (sublinear, gray) than the sum of  
 232 the single square PSPs.

233 (c) A PSP trace marked with the 4 measures used for further calculations. PSP peak, PSP area, area to  
 234 peak and mean voltage are indicated.

235 (d) Schematic of the input integration plot. Each circle represents response to one stimulus combination.  
 236 'Observed' (true response of 5 square stimulation) on Y-axis and 'Expected' (linear sum of 1 square  
 237 responses) is on X-axis.

238 (e) Most responses for a given cell show sublinear summation for a 5-square stimulus. The 4 panels show  
 239 sublinear responses for 4 different measures (mentioned in c) for the same cell. The grey dotted line is

240 the regression line and the slope of the line is the scaling factor for the responses for that cell. For peak  
241 (mV), area (mV.ms), average (mV), and area to peak (mV.ms); slope = 0.27, 0.23, 0.23, 0.18; R<sup>2</sup> 0.57,  
242 0.46, 0.46, 0.26 respectively. The responses to AUC and average are similar because of the similarity in  
243 the nature of the measure.

244 (f) Distribution of Observed/Expected ratio of peaks of all responses for all 5-square stimuli (mean= 0.57,  
245 SD = 0.31), from all recorded cells pooled. 93.35% responses to 5-square stimuli were sublinear (2513  
246 PSPs, n = 33 cells).

247 (g) Distribution of slopes for peak amplitude of 5-square stimuli (mean = 0.38, SD =0.22). Regression  
248 lines for all cells show that all cells display sublinear (<1 slope) summation (n = 33 cells).

## 249 CA3-CA1 network performs Subthreshold Divisive Normalization (SDN)

250

251 We then tested how summation sublinearity scaled with a larger range of inputs. We  
252 noted that nonlinear functions can be observed better with a large range of inputs<sup>27</sup>, and  
253 therefore increased the stimulus range (**Supplementary Fig 4,5**). Inhibition interacts with  
254 excitation to perform arithmetic operations like subtraction, division, and normalization<sup>28</sup>. We  
255 created a composite model to fit and test for the above three possibilities of EI integration:  
256 subtractive inhibition, divisive inhibition, and divisive normalization (**Eqn. 1**). **Eqn. 1** describes  
257 how inhibition controls the ‘observed’ response (O) as a function of ‘expected’ response (E), for  
258 the above three operations. Alpha (α) can be thought to be a subtractive inhibition parameter,  
259 beta (β) as a divisive inhibition parameter, and gamma (γ) a normalization parameter (**Fig. 4a**).

260

$$O = E - \frac{\beta E}{\gamma + E} E - \alpha \quad (1)$$

261

262 Using the framework of **Eqn. 1**, we asked what computation was performed at the CA3-  
263 CA1 network. We recorded from CA1 cells while stimulating CA3 with many combinations of 2,

264 3, 5, 7 or 9 squares (**Fig. 4b**). We selected cells with at least 50 input combinations, and pooled  
265 responses from all stimuli to a cell. Then, we fit equation 1 to the PSP amplitudes (**Fig. 4b**).  
266 From visual inspection, the subtractive inhibition model,  $O = E - \alpha$  (fixing  $\beta$ ,  $\gamma=0$ ) was a bad fit,  
267 since intercepts ( $\alpha$ ) were close to 0 (**Fig. 4a**).

268  
269 By fixing  $\gamma$  and  $\alpha$  to 0 in **Eqn. 1**, we obtained the Divisive Inhibition (DI) model. In this form,  $\beta$   
270 can be thought of as inhibition/excitation ratio. Increasing  $\beta$  decreases the observed response  
271 ( $O$ ) (**Fig. 4a**).

272

$$O = E - \beta E \quad (2)$$

273

274 Similarly,  $\beta$  was fixed to 1 and  $\alpha$  to 0 to get the Divisive Normalization (DN) model. This form of  
275 the equation was inspired by the analogous canonical divisive normalization equation for firing  
276 rates<sup>28</sup>. Here, decrease in  $\gamma$  implies increase in normalization (**Fig. 4a**).

277

$$O = E - \frac{E}{\gamma + E} E \quad (3)$$

278 We used least-squares polynomial regression to fit DI and DN models to our data. The  
279 goodness of fit for all cells was tested by comparing BIC (Bayesian Information Criterion) (**Fig.**  
280 **4c**) and reduced chi-squares of the models (**Supplementary Fig 6, Methods**). DN ( $\alpha = 0$ ,  $\beta = 1$ )  
281 was better than DI ( $\alpha = 0$ ,  $\gamma = 0$ ) model in explaining the data (BIC: Two-tailed paired t-test,  $P <$   
282  $0.00005$ , reduced chi-square: Two-tailed paired t-test,  $P < 0.00005$ ,  $n = 32$  cells).

283

284 Subthreshold Divisive Normalization (SDN) can be clearly seen in **Figure 4b**, where  
285 observed responses to stimuli with 5 mV and 15 mV expected responses are very similar. This  
286 shows that SDN allows CA1 cells to integrate a large range of inputs before reaching spike



287 threshold. Thus, testing with a larger range of inputs showed that the initial finding of constant  
288 I/E ratios from **Figure 2** needed to be elaborated based on the observed response saturation  
289 with increasing input strength. We examine mechanisms for this below (**Figure 5, 6**). In  
290 summary, we observed SDN as an outcome of integration of precisely balanced inputs in the  
291 CA3-CA1 network.

292

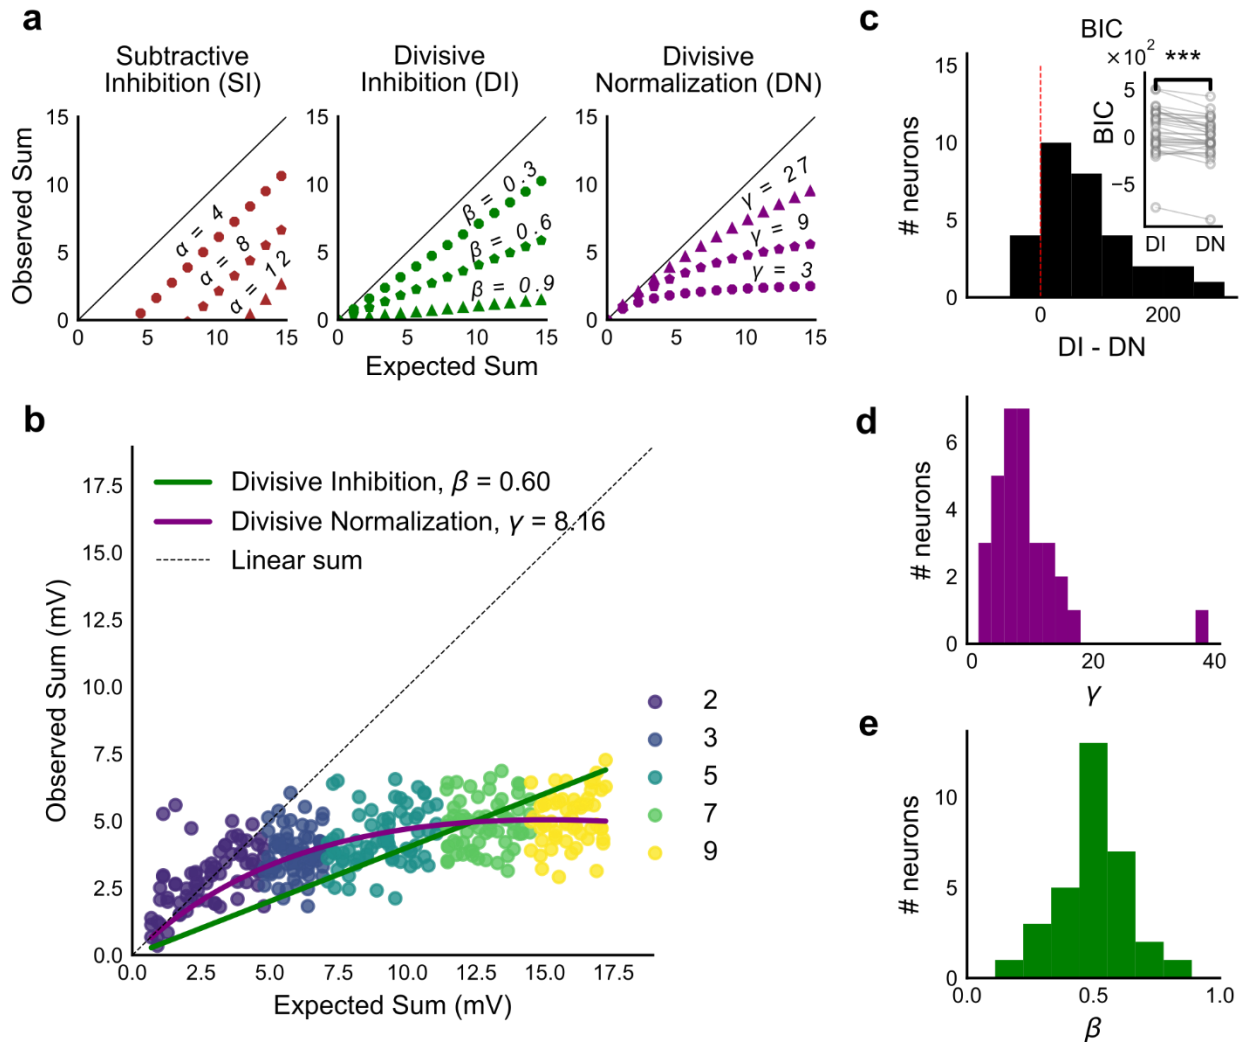

293

294

295 **Figure 4: Over a wide input range, integration of CA3 excitatory and feed-forward inhibitory input**

296 **leads to SDN at CA1**

297 (a) Three models of how inhibition interacts with excitation and modulates membrane potential: (left to

298 right) Subtractive Inhibition (SI), Divisive Inhibition (DI) and Divisive Normalization (DN). Note how

299 parameters  $\alpha$ ,  $\beta$  and  $\gamma$  from Eqn. 1 affect response output.

300 (b) Divisive normalization seen in a cell stimulated with 2, 3, 5, 7 and 9 square combinations. DN and DI

301 model fits are shown in purple and green respectively.

302 (c) Difference in Bayesian Information Criterion (BIC) values for the 2 models - DI and DN. Most  
303 differences between BIC for DI and DN were less than 0, which implied that DN model fit better,  
304 accounting for the number of variables used. Insets show raw BIC values. Raw BIC values were  
305 consistently lower for DN model, indicating better fit (Two-tailed paired t-test,  $P < 0.00005$ ,  $n = 32$  cells).  
306 (d) Distribution of the parameter  $\gamma$  of the DN fit for all cells (median = 7.9,  $n = 32$  cells). Compare with **a, b**  
307 to observe the extent of normalization.  
308 (e) Distribution of the parameter beta of the DI fit for all cells (mean = 0.5,  $n = 32$  cells). Values are less  
309 than 1, indicating sublinear behaviour.

### 310 **CA3 feedforward inhibition is necessary for subthreshold divisive normalization**

311 We first verified our hypothesis that SDN results from feedforward inhibition from CA3,  
312 and not from intrinsic properties of the CA1 neuron. We thus blocked inhibition and repeated the  
313 above experiment. We expected that SDN would be lost and linearity would be reinstated upon  
314 blocking inhibition.

315 We recorded responses of CA1 cells to our array of optical stimuli (**Fig. 1d, 5a**), then  
316 applied GABAzine to the bath and repeated the stimulus array (**Fig. 5b**). We found that when  
317 inhibition was blocked, summation approached linearity (**Fig. 5b, c**). We compared the scaling  
318 parameter  $\gamma$  of the divisive normalization model fit, for the above two conditions (**Eqn. 3**). The  
319 values of  $\gamma$  were larger with inhibition blocked, indicative of approach to linearity (Wilcoxon rank-  
320 sum test,  $P < 0.05$ ,  $n = 8$  cells) (**Fig. 5c**). The cells with inhibition blocked showed some residual  
321 sublinearity at high stimulus levels, which has been previously attributed to  $I_A$  conductance in  
322 CA1 neurons<sup>25</sup>. Thus, we confirmed that blocking inhibition reduced sublinearity, attenuating  
323 SDN.

324

## 325 **Precise balance is also seen at resting membrane potential**

326

327           Then, we hypothesised that the membrane potential change evoked by inhibitory  
328 synaptic currents could be increasing non-linearly with increasing CA3 input. In this scenario,  
329 even though the I/E ratio of conductances would be consistent across the range of input  
330 strengths, IPSP/EPSP amplitudes would increase nonlinearly. To address this, we compared  
331 responses to identical patterns before and after GABAzine application. For a given cell, for each  
332 pattern, we subtracted the initial control response with inhibition intact from the corresponding  
333 response with inhibition blocked. This gave us the inhibitory component or ‘derived inhibition’ for  
334 each stimulus pattern (**Fig. 5d, inset**). We found that all stimuli to a cell evoked proportional  
335 excitation and inhibition even when recorded at resting potential (**Fig. 5d, e**). Thus, we rejected  
336 our hypothesis of non-linear increase in inhibitory post-synaptic potential with excitatory post-  
337 synaptic potential at resting membrane potential. Over the population, the median slope of the  
338 proportionality line was around 0.7, indicating that the EI balance was slightly tilted towards  
339 higher excitation than inhibition (**Fig 5f**). IPSP/EPSP ratios (**Fig. 5f**) were smaller than  
340 IPSC/EPSC ratios (**Fig. 2f**) due to proximity of inhibition to its reversal ( $\sim -70\text{mV}$ ), than excitation  
341 to its reversal ( $\sim 0\text{mV}$ ), at resting membrane potential ( $\sim -65\text{mV}$ ). Overall, we saw precise  
342 balance in evoked excitatory and inhibitory synaptic potentials for >100 combinations per  
343 neuron.

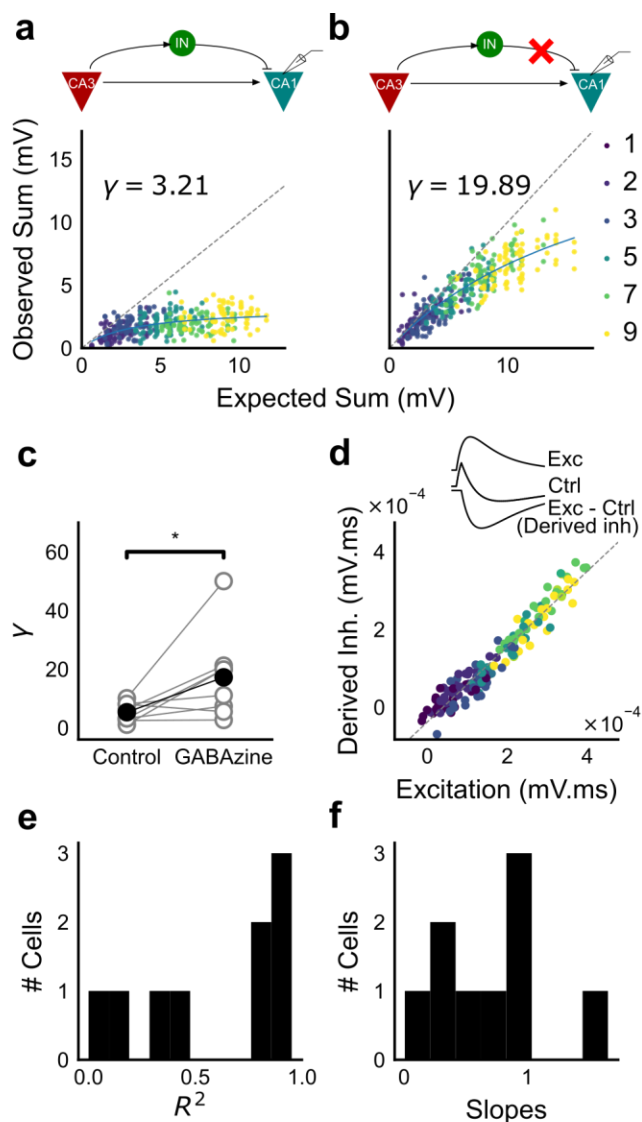

344

345

346 **Figure 5: Blocking balanced inhibition at resting membrane potential attenuates SDN**

347 (a) Top, schematic of experiment condition. Bottom, a cell showing divisive normalization in control  
 348 condition.

349 (b) Top, schematic of experiment condition with feedforward inhibition blocked (2uM GABAzine). Bottom,  
 350 responses of the same cell with inhibition blocked. The responses are much closer to the linear

351 summation line (dashed). The blue lines in **a**, **b** are the fits of the DN model. The value of  $\gamma$  of the fit  
352 increases when inhibition is blocked.

353 **(c)** The  $\gamma$  of the DN fits were calculated for both control and GABAzine case. Most cells had larger  $\gamma$  with  
354 GABAzine in bath (Wilcoxon rank sum test,  $P < 0.05$ ,  $n = 8$  cells), implying lower normalization.

355 **(d)** Excitation versus derived inhibition for all points for the cell shown in **a** (area under the curve) (Slope =  
356 0.97, r-square = 0.93, x-intercept =  $3.75e-5$  mV.ms). Proportionality was seen for all responses at resting  
357 membrane potential. 'Derived inhibition' was calculated by subtracting control PSP from the excitatory  
358 (GABAzine) PSP for each stimulus combination.

359 **(e,f)**  $R^2$  (median = 0.8) and slope values (median = 0.7) for all cells ( $n = 8$  cells), showing tight  
360 IPSP/EPSP proportionality, and slightly more excitation than inhibition at resting membrane potentials.

361

## 362 **Advancement of inhibitory onset timing with increasing input explains** 363 **subthreshold divisive normalisation**

364 We made a single compartment conductance model (**Fig. 6a, Eqn. 5**) to analyze the  
365 mechanism of SDN. We fit a function of difference of exponentials (**Methods**) to our voltage  
366 clamp data to extract the peak amplitudes and kinetics of excitation and inhibition currents  
367 (**Methods**). We used these and other parameters from literature (**Supplementary Table 1 and**  
368 **2**), and constrained the model to have EI balance, i.e. have maximum excitatory ( $g_{exc}$ ) and  
369 inhibitory conductance ( $g_{inh}$ ) proportional to each other, with a given I/E ratio. To test for SDN,  
370 we simulated our model in the range of experimentally determined I/E ratios, ranging from 0-5.

371 We observed that EI balance with constant EI delay is consistent with the divisive  
372 inhibition model (**Fig. 6b**). On the other hand, subthreshold divisive normalization implies  
373 progressively smaller changes in peak PSP amplitude with increase in excitatory input. We  
374 surmised that without changing EI balance, SDN should result if the inhibitory onset delays were

375 an inverse function of the excitation (**Fig. 6d, Eqn. 4**). Hence, we simulated the model with  
376 different values of inhibitory delay ( $\delta_{inh}$ ) as a function of the excitation.

377

$$\delta_{inh} = \delta_{min} + me^{-kg_{exc}} \quad (4)$$

378

379 Here  $\delta_{min}$  is the minimum synaptic delay between excitation and inhibition,  $k$  sets the  
380 steepness of the delay change with excitation, and  $m$  determines the maximum synaptic delay.  
381 In **Fig. 6c**, we show that SDN emerged when we incorporated delays changing as a function of  
382 the total excitatory input to the model neuron.

383

384 We then tested this model prediction. From the EPSC and IPSC fits (**Methods**), we  
385 extracted excitatory and inhibitory onsets, and subtracted the average inhibitory onsets from  
386 average excitatory onsets to get inhibitory delay ( $\delta_{inh}$ ) for each stimulus combination. We saw  
387 that  $\delta_{inh}$  indeed varied inversely with total excitation ( $g_{exc}$ ) (**Fig. 6e, f**). Notably, the relationship  
388 of delay with conductance with data from all cells pooled, seems to be a single inverse function,  
389 and might be a network property (**Fig. 6f, Supplementary Fig 8c**). This input dependent  
390 change in inhibitory delay could be attributed to delayed spiking of interneurons with small  
391 excitatory inputs, and quicker firing with larger excitatory inputs. Similar relationship between EI  
392 latency and strength has been seen in other brain regions<sup>29</sup>. Thus, inhibition clamps down the  
393 rising EPSP, resulting in saturation of PSP amplitude when excitation is increased (**Fig. 6c, 8**).

394

395 We then examined the sensitivity of SDN to proportionality, and delay between excitation  
396 and inhibition. To test if balance and predicted inhibitory delay relationship are required for SDN,  
397 we shuffled the balanced  $g_{inh}$  in relation with  $g_{exc}$ , and separately shuffled the relationship of

398  $\delta_{inh}$  and  $g_{exc}$ . In both cases, SDN was strongly attenuated, implying that both EI balance and  
399 inverse scaling of inhibitory delay were necessary for SDN (**Supplementary Fig 8a, b**).

400

401 Thus our analysis of a conductance model suggests that SDN could be a general  
402 property of balanced feedforward networks, due to two characteristic features: EI balance and  
403 inhibitory kinetics. Each of these variables may be subject to plasticity and modulation to attain  
404 different amounts of normalization (**Fig. 8c,d, Supplementary Fig 9**).



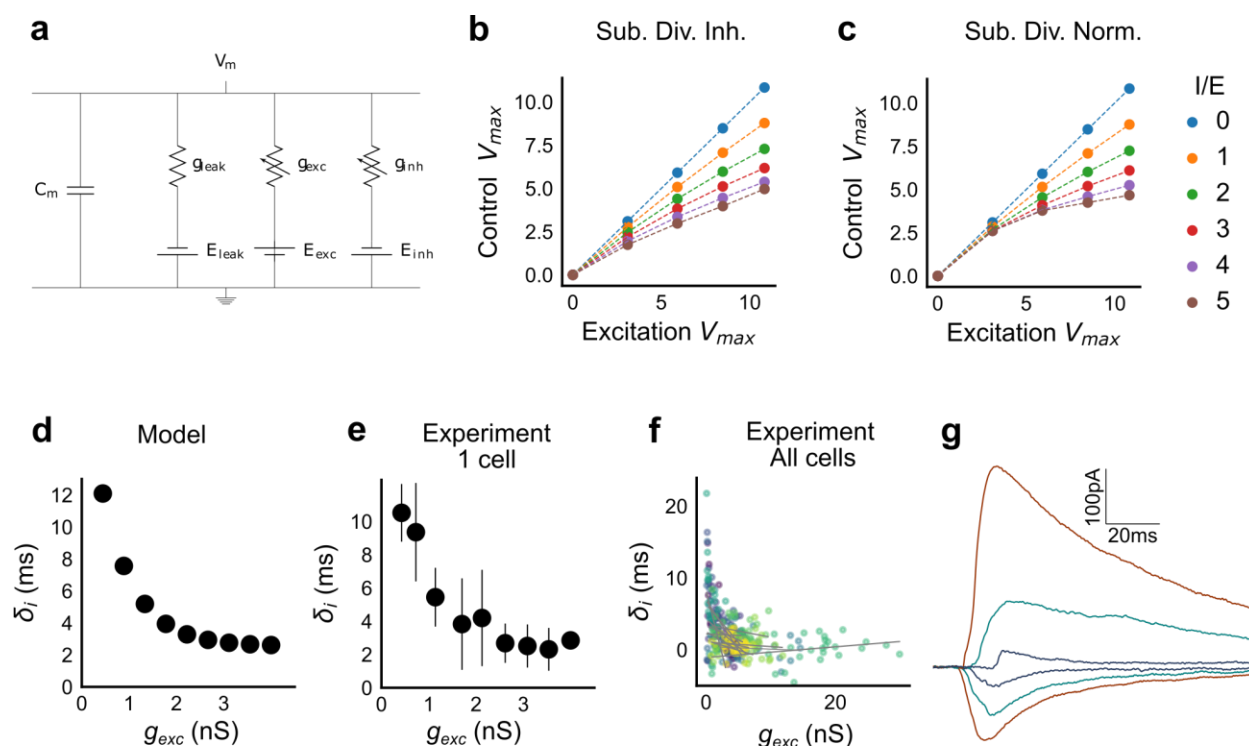

405

406 **Figure 6: Conductance model predicts Excitatory-Inhibitory delay as an important parameter for**  
 407 **divisive normalization.**

408 (a) Equivalent circuit for the conductance model showing capacitive, excitatory, inhibitory, and leak  
 409 components.

410 (b) PSP peak amplitude with both excitatory and balanced inhibitory inputs is plotted against the EPSP  
 411 peak amplitude with only excitatory input. Model showed divisive inhibition for I/E proportionality ranging  
 412 from 0 to 5 when the inhibitory delay was kept constant. Different colours show I/E ratios (P).

413 (c) Same as in b, except the inhibitory delay was varied inversely with excitatory conductance (as shown  
 414 in d). Subthreshold Divisive Normalization (SDN) was observed, and the normalization gain was  
 415 sensitive to the I/E ratio.

416 (d) Inverse relationship of E-I delays with excitation. Inhibitory delay was varied with excitatory  
 417 conductance in Eqn. 4 with  $\delta_{min} = 2$  ms,  $k = 2$  /nS, and  $m = 13$  ms.

418 (e) Data from an example cell showing the relationship of E-I delays with excitation. The relationship is  
 419 similar to the prediction in e.

420 (f) Data from all cells showing delay as a function of excitation. Different colours indicate different cells (n  
421 = 13 cells). Grey lines are linear regression lines through individual cells.

422 (g) Traces showing the decreasing excitatory inhibitory delay with increasing amplitude of PSCs. Each  
423 trace is an average of 6 repeats.

424

## 425 Stimulus information is encoded both in amplitude and time

426

427 What does SDN mean for information transmission in balanced networks? While SDN  
428 allowed the cell to integrate a large range of inputs before reaching spiking threshold, it also  
429 resulted in saturation of PSP peaks at larger inputs (**Fig. 4b**). This implied that information about  
430 the input was partially 'lost' from the PSP amplitude. However, we observed that due to the  
431 decreasing EI delay ( $\delta_{inh}$ ) with increasing excitation ( $g_{exc}$ ) (**Fig. 6d**), PSP times to peak became  
432 shorter, preserving some information about the input in time (**Fig 7a, b, Fig. 8b**). In contrast,  
433 while the peak amplitudes seen with GABAzine predicted the input more reliably, peak times of  
434 EPSPs did not change much with input (**Fig. 7c,d**). Thus, PSP peak time may carry additional  
435 information about stimulus strength, when EI balance is maintained.

436

437 We quantified this using an information theoretical framework<sup>30</sup>. We took linear sum of 1  
438 square PSP peak amplitudes (Expected sum), as a proxy for input strength. We then calculated  
439 the mutual information between Expected sum and peak PSP amplitudes of the corresponding  
440 N-squares, and between Expected sum and PSP peak timing (**Methods**). Using this, we asked,  
441 how is the information about the input divided between PSP peak amplitude and timing? We  
442 found that peak timing had more information in presence of inhibition (control), and peak  
443 amplitude had more information in absence of inhibition (GABAzine) (**Fig. 7f**). The total mutual  
444 information of both peak amplitude and peak timing with expected sum was slightly lesser in the

445 presence of inhibition, but this difference was statistically not significant (**Fig. 7e**) (Wilcoxon  
446 Rank sum test ( $< 0.05$ ),  $P = 0.4$ ,  $n = 7$  cells). Further, we asked, how better can we predict the  
447 input, with the knowledge of peak timing, when the peak amplitude is already known? We found  
448 that in the presence of inhibition, peak amplitude carried only a part of the total information  
449 about the input, and further knowledge of peak time substantially increased the total information.  
450 In contrast, in the absence of inhibition, peak amplitude carried most of the information about  
451 input, and there was very little gain in information with the knowledge of peak times (**Fig. 7f**)  
452 (Wilcoxon Rank sum test ( $< 0.05$ ),  $n = 7$  cells).

453 Overall, these results suggest that with inhibition intact, input information is shared  
454 between amplitude and time, and knowledge of peak time and amplitude together contains  
455 more information about input than either of them alone.

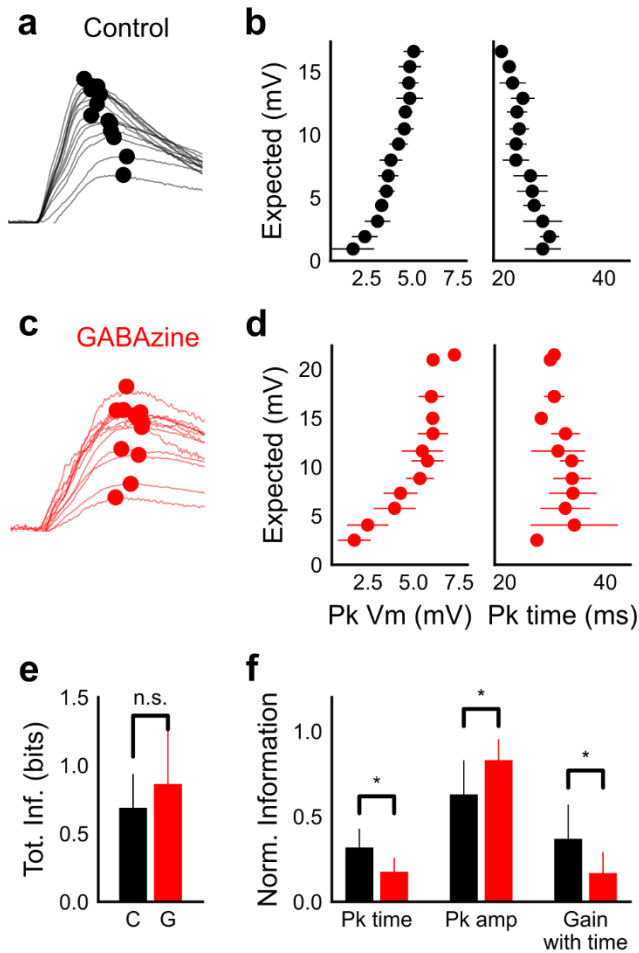

456

457

458 **Figure 7: CA3 input strength is encoded in both amplitude and peak time of CA1 PSPs in**  
459 **presence of feedforward inhibition**

460 (a,c) The peak arrives earlier as input gets larger in control case (black), but not with GABAzine in bath  
461 (red). Averaged traces for an example cell, control (black) and with GABAzine in bath (red). Each trace is  
462 averaged over all PSPs within a bin of 'expected sum' strength. Bin centres are as per y axis in panel c.  
463 (b) Averaged peak Vm (PSP amplitude) and peak time plotted against Expected Vm. Both amplitude and  
464 time change as a function of input (Expected sum).  
465 (d) Same as b, but in the presence of GABAzine. As a function of Expected sum, amplitude changes  
466 more than control, but time changes less than control.

467 (e) Total mutual information of peak amplitude and peak timing with expected sum is not significantly  
468 different between Control and GABAzine case (Wilcoxon Rank sum test ( $< 0.05$ ),  $P = 0.4$ ,  $n = 7$  CA1  
469 cells).

470 (f) Normalized mutual information between Expected Vm and peak time, Expected Vm and peak  
471 amplitude, and conditional mutual information between Expected Vm and peak time, given the knowledge  
472 of peak amplitude. Normalized information was calculated by dividing mutual information by total  
473 information (e) for each cell. Peak times carry more information in the presence of inhibition, and peak  
474 amplitudes carry more information in the absence of inhibition. There is higher gain in information about  
475 the input with timing if the inhibition is kept intact (Wilcoxon Rank sum test ( $P < 0.05$ ),  $n = 7$  CA1 cells).

476

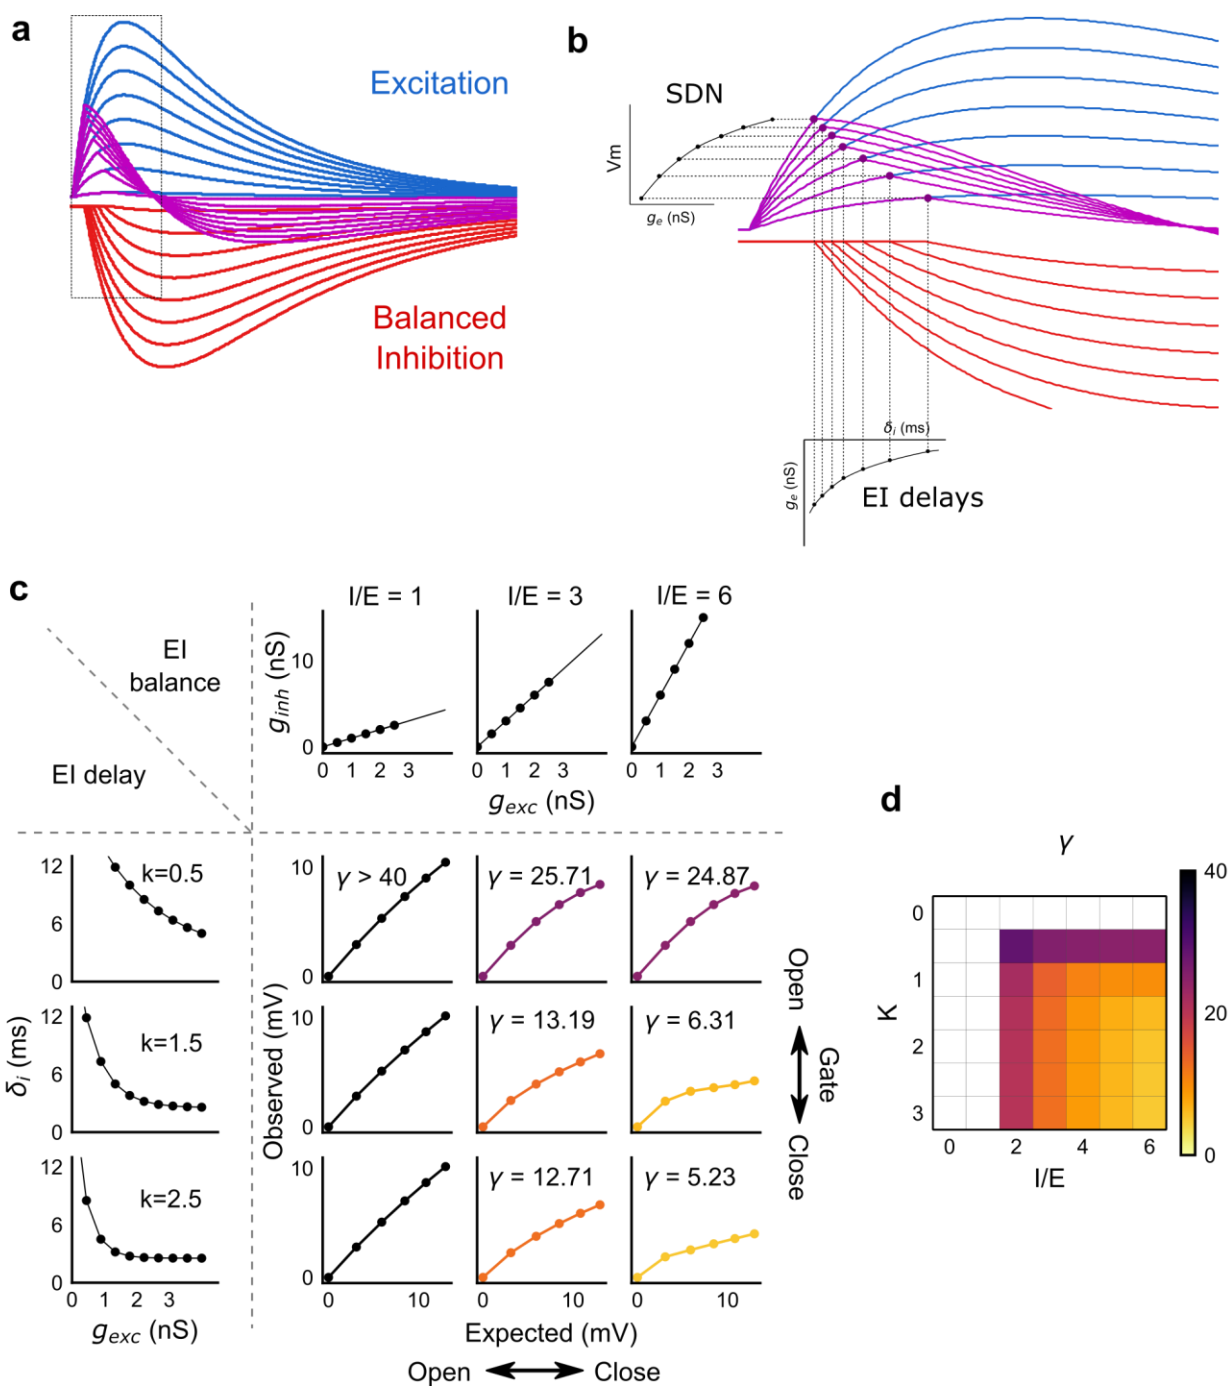

477

478

479 **Figure 8: Emergence of SDN from balanced excitation and inhibition, coupled with dynamic EI**

480 **delays**

481 (a) Schematic showing precisely balanced EPSPs (blue) and corresponding IPSPs (red) summing to  
482 produce PSPs (purple). The EPSPs and IPSPs increase in equal input steps.

483 (b) Zooming into the portion in the rectangle in a. Excitation onset is constant, but inhibition onset  
484 changes as an inverse function of input or conductance ( $g_{exc}$ ), as shown in **Figure 6e**. With increasing  
485 input, inhibition arrives earlier and cuts into excitation earlier for each input step. This results in smaller  
486 differences in excitatory peaks with each input step, resulting in SDN. The timing of PSP peaks (purple)  
487 becomes progressively advanced, whereas the timing of EPSP peaks (blue) does not, consistent with our  
488 results in **Figure 7**.

489 (c,d) Normalization as a function of the two building blocks – EI balance (I/E ratio) and EI delays  
490 (interneuron recruitment kinetics,  $k$ ), as predicted by the model. Larger values of both imply greater  
491 normalization and increased gating. Colors of the SDN curves depict the value of gamma ( $\gamma$ ), as shown in  
492 the phase plot in d.

493

## 494 DISCUSSION

495 This study describes two fundamental properties of the CA3-CA1 feedforward circuit:  
496 balanced excitation and inhibition from arbitrary presynaptic CA3 subsets, and an inverse  
497 relationship of excitatory-inhibitory delays with CA3 input amplitude. By optogenetic  
498 photostimulation of CA3 with hundreds of unique stimulus combinations, we were able to  
499 observe precise EI balance at individual CA1 neurons for every input combination presented.

500 Stronger stimuli from CA3 led to proportional increase in excitatory and inhibitory amplitudes at  
501 CA1, and a decrease in the delay with which inhibition arrived. Consequently, larger CA3 inputs  
502 had shorter inhibitory delays, which led to progressively smaller changes in CA1 membrane  
503 potential. We term this gain control mechanism subthreshold divisive normalization (SDN). This

504 reduction in inhibitory delay with stronger inputs contributes to a division of input strength coding  
505 between PSP amplitude and PSP timing.

## 506 **Precise balance in the hippocampus**

507

508 We found that arbitrary subsets of synaptic inputs from CA3 to a given CA1 neuron were  
509 balanced (**Fig. 2, 5d,e**) and inhibition followed excitation at millisecond timescales (**Fig 6e,f,g**).

510 By targeted optogenetic stimulation of CA3 pyramidal neurons, we eliminated non-specific  
511 monosynaptic stimulation of interneurons. This ensured the isolation of the canonical  
512 feedforward inhibitory microcircuit in a slice. Our findings demonstrate that precise EI balance is  
513 maintained by arbitrary combinations of neurons in the presynaptic network, despite the  
514 reduced nature of the slice preparation, with no intrinsic network dynamics. This reveals  
515 exceptional structure in the connectivity of the network. Theoretical analyses suggest that  
516 networks can achieve detailed balance with inhibitory Spike Timing Dependent Plasticity  
517 (iSTDP) rules<sup>21,31,32</sup>. Such an iSTDP rule has been observed in the auditory cortex<sup>33</sup>. Given that  
518 balance needs to be actively maintained<sup>34</sup>, we suspect that similar plasticity rules<sup>21</sup> may also  
519 exist in the hippocampus. Moreover, the change in inhibitory delay with increasing excitatory  
520 input may have interesting consequences for any STDP rule such as the inhibitory plasticity rule  
521 suggested theoretically<sup>31</sup>.

522 Precisely balanced networks, with all input subsets balanced, are well suited for input  
523 gating<sup>21,35</sup>. The finding that most CA1 cells can be converted to place cells predicts the  
524 existence of an input gating mechanism<sup>36</sup>, but the exact nature of this mechanism has  
525 remained unknown. Precise balance at all inputs suggests that although synaptic inputs for  
526 several place fields may be sent to a CA1 cell, no place specific activity is observed because all  
527 inputs are balanced or gated 'off' in default state. Evoked depolarizations<sup>36</sup> or dendritic plateau  
528 potentials<sup>37,38</sup>, which potentiate the subset of active synapses, ie change I/E ratio<sup>39</sup>, can flip the  
529 gate 'on' for the specific subset of inputs, thereby converting a silent cell to a place cell for that



530 specific place field. This reasoning corroborates the observation of homogenous inhibition  
531 suppressing out-of-field heterogeneously tuned excitation<sup>39</sup>, while providing a finer/synaptic  
532 scale view of the gating mechanism.

533

### 534 **EI delays and temporal coding**

535

536 In several EI networks in the brain, inhibition is known to suppress excitation after a  
537 short time delay, leaving a “window of opportunity” for spiking to occur<sup>2,40,41</sup>. We have shown  
538 that balanced inhibitory input arrives with a delay modulated by the excitatory input in a  
539 feedforward circuit. This helps encode the input information in both amplitude and timing of the  
540 PSP (**Fig. 7**), thus partially decoupling spiking probability from spike timing. In other words,  
541 large inputs can be represented with fewer spikes, while conserving input information in spike  
542 timing, when naively it would seem that increasing the number of spikes might be the way to  
543 represent increasing input. Similar dual encoding has been observed in somatosensory cortex  
544 <sup>42</sup>. In CA1, a classic example of dual coding is theta phase precession<sup>43</sup>. In addition, spike times  
545 during sharp wave ripples, gamma oscillations and time cell representations are also precise up  
546 to ~10ms, which is the range of the dynamic “window of opportunity” we observe. Notably, as  
547 the window changes in an excitation dependent manner, the neuron can transition from  
548 temporal integration mode at small input amplitudes to coincidence detection at large input  
549 amplitudes<sup>2,41,44</sup>.

550

551

### 552 **Subthreshold Divisive Normalization (SDN): a novel gain control mechanism**

553

554 EI balance and dynamic EI delays together give rise to SDN, which modulates synaptic  
555 summation gain at single neuron level and determines how much input gets gated to change

556 postsynaptic membrane potential. SDN expands the dynamic range of inputs that a neuron can  
557 accommodate before reaching spike threshold (**Supplementary Fig 10**). This is particularly  
558 useful for temporally coding, sparse spiking neurons like CA1<sup>45</sup>. Our study was uniquely able to  
559 observe SDN because of the large range of inputs possible in our experiments. A narrow range  
560 of inputs, similar to what has been used earlier for pairwise summation experiments, is not well  
561 suited for characterizing summation nonlinearities, and this limitation has been pointed out by  
562 computational analyses<sup>27</sup>.

563

564         So far, analogous gain control by divisive normalization has only been observed for firing  
565 rates of neurons<sup>28</sup>. Hence, the timescales of gain change in DN are averaged over longer  
566 periods, over which rates change. As opposed to this, in SDN, gain of every input is normalized  
567 at synaptic (millisecond) timescales. Our results add a layer of subthreshold gain control in  
568 single neurons, to the known suprathreshold gain control at the population level in CA1<sup>46</sup> This  
569 two-step gain control implies that the dynamic range of the population may be higher than  
570 previously estimated.

571

572         Moreover, while most experimental observations of firing rate gain change have been  
573 explained by the phenomenological divisive normalization equation, the mechanistic basis for  
574 normalization has been unclear. We demonstrate with a clear biophysical model how SDN  
575 emerges from interaction of balanced excitatory and inhibitory inputs, connecting our  
576 phenomenological model with known biophysics. In our phenomenological SDN model, the  
577 parameter  $\gamma$  represents summation gain, or the extent of input gating at CA1 (**Eqn. 1, Fig. 4a**).  $\gamma$   
578 is controlled by the following two biophysical quantities: I/E ratio; and the recruitment kinetics of  
579 the interneurons ( $k$ ) (**Eqn. 4, Fig. 8c,d, Supplementary Fig 9**), which can control the amplitude  
580 and temporal gate respectively. Dynamic regulation of EI delay has been theoretically explored

581 in balanced networks<sup>20,47</sup> for temporal gating of inputs, where both amplitude and temporal  
582 gates can be independently modulated, and transient inputs can also be gated.

583

584 I/E ratio can be changed by neuromodulation<sup>48,49</sup>, by short term plasticity mechanisms<sup>50–</sup>  
585 <sup>52</sup> and by disinhibition<sup>53</sup>. Although we show that EI delays are input amplitude dependent, they  
586 may be modulated by external signals, or behavioural states, such as attention<sup>54</sup> to gate the  
587 output of individual neurons (**Fig. 8c,d**). For example, interneuron recruitment based changes  
588 have been shown to exist in thalamocortical neurons<sup>44</sup>. Thus, temporal gating by EI delays<sup>20</sup>,  
589 combined with the amplitude gating by detailed balance<sup>17</sup> could be a powerful mechanism for  
590 gating signals<sup>20</sup> in the hippocampal feedforward microcircuit.

591

592 Several studies point towards the existence of precise EI balance in the cortex<sup>2–4,11–13</sup>,  
593 and here we have shown it in the hippocampus. We propose that input strength dependent  
594 inhibitory delay change may be a general property of feedforward network motifs. Together,  
595 these suggest that precisely balanced feedforward networks are elegantly suited for controlling  
596 gain, timing and gating at individual neurons in neural circuits.

## 597 **METHODS**

### 598 **Animals**

599 All experimental procedures were approved by the National Centre for Biological  
600 Sciences Institutional Animal Ethics Committee (Protocol number USB–19–1/2011), in  
601 accordance with the guidelines of the Government of India (animal facility CPCSEA registration  
602 number 109/1999/CPCSEA) and equivalent guidelines of the Society for Neuroscience. CA3-cre  
603 (C57BL/6-Tg (Grik4-cre) G32-4Stl/J mice, Stock number 006474) were obtained from Jackson  
604 Laboratories. The animals were housed in a temperature controlled environment with a 14-h  
605 light: 10h dark cycle, with *ad libitum* food and water.

### 606 **Virus injections**

607 21-30 days old male transgenic mice were injected with Lox-ChR2  
608 (AAV5.CAGGS.Flex.ChR2-tdTomato.WPRE.SV40) virus obtained from University of  
609 Pennsylvania Vector Core. Injection coordinates used were -2.0mm RC, +/-1.9mm ML, -1.5mm  
610 DV. ~300-400nl solution was injected into the CA3 region with brief pressure pulses using  
611 Picospritzer-III (Parker-Hannifin, Cleveland, OH, USA). Animals were allowed to recover for at  
612 least 4 weeks following surgery.

### 613 **Slice Preparation**

614 8-6 week (4-8 weeks post virus injection) old mice were anesthetized with halothane and  
615 decapitated post cervical dislocation. Hippocampus was dissected out and 350um thick  
616 transverse hippocampal slices were prepared. Slices (350 microns) were cut in ice-cold high  
617 sucrose ASCF containing (in mM) - 87 NaCl, 2.5 KCl, 1.25 NaH<sub>2</sub>PO<sub>4</sub>, 25 NaHCO<sub>3</sub>, 75 sucrose,  
618 10 glucose, 0.5 CaCl<sub>2</sub>, 7 MgCl<sub>2</sub>. For cut slice control experiments, CA3 was removed at this  
619 stage. Slices were stored in a holding chamber, in artificial cerebro-spinal fluid (aCSF)

620 containing (in mM) - 124 NaCl, 2.7 KCl, 2 CaCl<sub>2</sub>, 1.3 MgCl<sub>2</sub>, 0.4 NaH<sub>2</sub>PO<sub>4</sub>, 26 NaHCO<sub>3</sub>, and  
621 10 glucose, saturated with 95% O<sub>2</sub>/5% CO<sub>2</sub>. After at least an hour of incubation, the slices were  
622 transferred to a recording chamber and perfused with aCSF at room temperature.

## 623 **Electrophysiology**

624 Whole cell recording pipettes of 2-5MO were pulled from thick-walled borosilicate glass  
625 on a P-97 Flaming/Brown micropipette puller (Sutter Instrument, Novato, CA). Pipettes were  
626 filled with internal solution containing (in mM) 130 K-gluconate, 5 NaCl, 10 HEPES, 1 EGTA, 2  
627 MgCl<sub>2</sub>, 2 Mg-ATP, 0.5 Na-GTP and 10 Phosphocreatinine, pH adjusted to 7.3, osmolarity  
628 ~285mOsm. The membrane potential of CA1 cells was maintained near -65mV, with current  
629 injection, if necessary. GABA-A currents were blocked with GABA<sub>A</sub>zine (SR-95531, Sigma) at  
630 2uM concentration for some experiments. Cells were excluded from analysis if the input  
631 resistance changed by more than 25% (measured for 15/39 cells) or if membrane voltage  
632 changed more than 2.5mV (measured for 39/39 cells, maximum current injected to hold the cell  
633 at the same voltage was +/-15 pA) of the initial value. For voltage clamp recordings, the K-  
634 gluconate was replaced by equal concentration Cs-gluconate. Cells were voltage clamped at  
635 0mV (close to calculated excitation reversal) and -70mV (calculated inhibition reversal) for IPSC  
636 and EPSC recordings respectively. At 0mV a small component of APV sensitive inward current  
637 was observed, and was not blocked during recordings. Cells were excluded if series resistance  
638 went above 25MO or if it changed more than 30% of the initial value, with mean series  
639 resistance being 15.7MO +/- 4.5MO std (n=13). For CA3 current clamp recordings, the cells  
640 were excluded if the V<sub>m</sub> changed by 5mV of the initial value. For whole-cell recordings, neurons  
641 were visualized using infrared microscopy and differential interference contrast (DIC) optics on

642 an upright Olympus BX61WI microscope (Olympus, Japan) fitted with a 40X (Olympus  
643 LUMPLFLN, 40XW), 0.8NA water immersion objective.

#### 644 **Data Acquisition**

645 Recordings were acquired on a HEKA EPC10 double plus amplifier (HEKA Elektronik,  
646 Germany) and filtered 2.9 kHz and digitized at 20 kHz. All analysis was done using custom  
647 written software in Python 2.7.12 and Matlab R2012b.

#### 648 **Optical stimulation setup**

649 Optical stimulation was done using DMD (Digital Micromirror Device) based Optoma  
650 W316 projector (60Hz refresh rate) with its color wheel removed. Image from the projector was  
651 miniaturized using a Nikon 50mm f/1.4D lens and formed at the focal plane of the tube lens,  
652 confocal to the sample plane. The white light from the projector was filtered using a blue filter  
653 (Edmund Optics, 52532), reflected off of a dichroic mirror (Q495LP, Chroma), integrated into the  
654 light path of the Olympus microscope, and focused on sample through a 40X objective. This  
655 arrangement covered a circular field of around 200 micron diameter on sample. 2.5 pixels  
656 measured 1 micron at sample through the 40X objective. Light intensity, measured using a  
657 power meter, was about 150mW/mm<sup>2</sup> at sample surface. Background light from black screen  
658 usually elicited no or very little synaptic response at recorded CA1 cells. A shutter (NS15B,  
659 Uniblitz) was present in the optical path to prevent the slice from being stimulated by  
660 background light during the inter-trial interval. The shutter was used to deliver stimulus of 10-

661 15ms per trial. A photodiode was placed in the optical path after the shutter to record  
662 timestamps of the delivered stimuli.

### 663 **Patterned optical stimulation**

664 Processing 2 was used for generating optical patterns. All stimuli were 16 micron  
665 squares sub sampled from a grid. 16 micron was chosen since it is close to the size of a CA3  
666 soma. The light intensity and square size were standardized to elicit typically 1 spike per cell per  
667 stimulus. The number of spikes varied to some extent based on the expression of ChR2, which  
668 varied from cell to cell. The switching of spots from one trial to next, at 3 sec inter trial interval,  
669 prevented desensitization of ChR2 over successive trials (**Fig. 1g**).

670

671 For a patched CA1 cell, the number of connected CA3 neurons stimulated per spot was  
672 estimated to be in the range of 1 to a maximum of 50 for responses ranging from 0 to 2mV.  
673 These calculations were done assuming a contribution of 0.2mV per synapse<sup>23</sup> and release  
674 probability of ~0.2<sup>55</sup>. This number includes responses from passing axons, which could also get  
675 stimulated in our preparation.

676

677 We did not observe any significant cross stimulation of CA1 cells. CA1 cells were  
678 patched and the objective was shifted to the CA3 region of the slice, where the optical patterns  
679 were then projected. CA1s showed no response to optical stimulation because of (i) ChR2 was  
680 restricted to CA3 cells, (ii) physical shifting of the objective away from CA1 also made sure that  
681 any leaky expression, if present, did not elicit responses.

682

683 We used 4 different stimulus grids (**Supplementary Fig 11**). All squares from a grid  
684 were presented individually (in random order) and in a stimulus set - randomly chosen

685 combinations of 2, 3, 5, 7, or 9, with 2 or 3 repeats of each combination. The order of  
686 presentation of a given N square combination was randomized from cell to cell.

687

## 688 **Data Analysis**

689 Data analysis was done using Python, numpy, scipy, matplotlib and other free libraries.

690 All analysis code is available as a free library at (<https://github.com/sahilm89/linearity>).

691

## 692 **Pre-processing**

693 PSPs and PSCs were filtered using a low pass Bessel filter at 2 kHz, and baseline  
694 normalized using 100 ms before the optical stimulation time as the baseline period. Period of  
695 interest was marked as 100 ms from the beginning of optical stimulation, as it was the typical  
696 timescales of PSPs. Timing of optical stimulation was determined using timestamp from a  
697 photodiode responding to the light from the projector. Trials were flagged if the PSP in the  
698 interest period were indistinguishable from baseline period due to high noise, using a 2 sample  
699 KS test (p-value < 0.05). Similarly, action potentials in the interest period were flagged and not  
700 analyzed, unless specifically mentioned.

701

## 702 **Feature extraction**

703 A total of 4 measures were used for analyzing PSPs and PSCs (**Fig. 3c**). These were  
704 mean, area under the curve, average and area to peak. This was done to be able to catch  
705 differences in integration at different timescales, as suggested by Poirazi et al<sup>27</sup>. Trials from CA1  
706 were mapped back to the grid locations of CA3 stimulation for comparison of Expected and



707 Observed responses. Grid coordinate-wise features were calculated by averaging all trials for a  
708 given grid coordinate.

709

#### 710 **Subthreshold Divisive Normalization model**

711 Different models of synaptic integration: Subtractive Inhibition, Divisive Inhibition, and

712 Divisive Normalization models were obtained by constraining parameters in **Equation 1**. The

713 models were then fit to the current clamp dataset using Imfit. Reduced chi-squares

714 **(Supplementary Fig 6)** and Bayesian Information Criterion (**Fig 4c**) were used to evaluate the  
 715 goodness of fits of these models to experimental data.

716

## 717 **Single compartment model**

718 A single compartment conductance based model was created in Python using sympy  
 719 and numpy. The model consisted of leak, excitatory and inhibitory synaptic conductances  
 720 (**Eqn.5, Fig 6a**) to model the subthreshold responses by the CA1 neurons.

721

$$C_m \frac{dV_m}{dt} = g_{leak}(V_m - E_{leak}) + g_{exc}(V_m - E_{exc}) + g_{inh}(V_m - E_{inh}) \quad (5)$$

722

723 The parameters used for the model were taken directly from data, or literature  
 724 (**Supplementary Table 2**). The synaptic conductances  $g_{exc}(t)$ , and  $g_{inh}(t)$  were modeled as  
 725 difference of exponentials (**Eqn. 6 and 7**):

726

$$g_{exc}(t) = \bar{g}_{exc} \left( \frac{e^{\left(\frac{-t}{\tau_{decay}}\right)} - e^{\left(\frac{-t}{\tau_{rise}}\right)}}{-\left(\frac{\tau_{rise}}{\tau_{decay}}\right)^{\frac{\tau_{decay}}{\tau_{decay} - \tau_{rise}}} + \left(\frac{\tau_{rise}}{\tau_{decay}}\right)^{\frac{\tau_{rise}}{\tau_{decay} - \tau_{rise}}}} \right) \quad (6)$$

727

728

$$g_{inh}(t) = \bar{g}_{inh} \left( \frac{e^{\left(\frac{\delta_{inh}-t}{\tau_{decay}}\right)} - e^{\left(\frac{\delta_{inh}-t}{\tau_{rise}}\right)}}{-\left(\frac{\tau_{rise}}{\tau_{decay}}\right)^{\frac{\tau_{decay}}{\tau_{decay} - \tau_{rise}}} + \left(\frac{\tau_{rise}}{\tau_{decay}}\right)^{\frac{\tau_{rise}}{\tau_{decay} - \tau_{rise}}}} \right) \quad (7)$$

729

730 For the divisive normalization case, the inhibitory delays ( $\delta_{inh}$ ) were modelled to be an  
731 inverse function of  $g_{exc}(t)$  (**Eqn.4**). In other cases, they were assumed to be constant and  
732 values were taken from **Supplementary Table 2**.

733

## 734 **Fitting data**

735 Voltage clamp data was fit to a difference of exponential functions (**Eqn.8**,  
736 **Supplementary Fig 7**) by a non-linear least squares minimization algorithm using Imfit, a freely  
737 available curve fitting library for Python. Using this, we obtained amplitudes ( $\bar{g}$ ), time course  
738 ( $\tau_{rise}, \tau_{decay}$ ) and onset delay from stimulus ( $\delta_{onset}$ ) for both excitatory and inhibitory currents.  
739 We then calculated inhibitory onset delay ( $\delta_{inh}$ ) by subtracting onset delay of excitatory from  
740 inhibitory traces.

741

$$g(t) = \bar{g} \left( \frac{e^{\left(\frac{\delta_{onset} - t}{\tau_{decay}}\right)} - e^{\left(\frac{\delta_{onset} - t}{\tau_{rise}}\right)}}{-\left(\frac{\tau_{rise}}{\tau_{decay}}\right)^{\frac{\tau_{decay}}{\tau_{decay} - \tau_{rise}}} + \left(\frac{\tau_{rise}}{\tau_{decay}}\right)^{\frac{\tau_{rise}}{\tau_{decay} - \tau_{rise}}}} \right) \quad (8)$$

## 742 **Onset detection**

743 Onsets were also detected using 3 methods. Since we propose onset delays to be a  
744 function of the excitation peak, we avoided onset finding methods such as time to 10% of peak,  
745 which rely on peaks of the PSCs. We used threshold based (time at which the PSC crossed a  
746 threshold), slope based (time at which the slope of the PSC onset was the steepest) and a  
747 running window based methods. In the running window method, we run a short window of 0.5  
748 ms, and found the time point at which distributions of two consecutive windows became

749 dissimilar, using a 2 sample KS test. Ideally, with no input, the noise distribution across two  
750 consecutive windows should remain identical. All 3 methods gave qualitatively similar results.

### 751 **Mutual Information calculation**

752 Mutual information was calculated by the histogram method. The calculated linear sum  
753 from one square PSP peak amplitude responses, measured N-square peak amplitudes and  
754 time were binned with equal number of bins. The bins were calculated using Sturges' Rule. Bin  
755 frequencies were divided by the total number of responses to get the probability of

756 occurrence  $p(x)$  of each bin. Mutual Information was then calculated for all pairs of combinations  
757 between linear sum, peak amplitude and time using **Eqn.9 and 10**.

758

$$MI(X, Y) = H(X) + H(Y) - H(X, Y) \quad (9)$$

759

760 Where Shannon's entropy  $H(X)$  for a variable  $X$ , is given as:

761

$$H(X) = \sum_{x \in X} -p(x) \log_2 p(x) \quad (10)$$

762

763 Further, conditional mutual Information was calculated to measure gain in information about  
764 input (linear sum) by knowledge of peak timing when peak amplitude is already known. It was  
765 calculated using **Equation 11**.

766

$$I(X; Y|Z) = H(X, Z) + H(Y, Z) - H(X, Y, Z) - H(Z) \quad (11)$$

767

768 Normalized mutual information was calculated by dividing mutual information between pairs of  
769 variables by the total information between all three variables (**Equation 12**).

770

$$I(X; Y, Z) = H(Z) + H(X, Y) - H(X, Y, Z) \quad (12)$$

771

772

## 773 ACKNOWLEDGEMENTS

774 AB and SM were supported by NCBS/TIFR and Council of Scientific and Industrial  
775 Research (CSIR). We acknowledge support from the University Grants Commission/Israel  
776 Science Foundation grant (UGC/ISF No. F 6-18/2014(IC)). We acknowledge the National  
777 Mouse Resource (NaMoR) facility funded by Department of Biotechnology for housing and  
778 maintaining all animals used in this study. We would like to thank Nikhila Krishnan and Shriya  
779 Palchadhuri for help with genotyping; and Kambadur Ananthamurthy, Sathya Subramaniam,  
780 Deepanjanli Dwivedi, Oliver Muthmann, Mehrab Modi, Dinesh Natesan, Aditya Gilra, Arvind  
781 Kumar and Rishikesh Narayanan for discussions and suggestions on the manuscript.

782

## 783 AUTHOR CONTRIBUTIONS

784 AB, SM and USB designed the study. AB performed the experiments and did part of the  
785 analysis. SM did most of the analysis and implemented the models. All authors wrote the  
786 manuscript.

787

## 788 REFERENCES

- 789 1. Anderson, J. S., Carandini, M. & Ferster, D. Orientation tuning of input conductance,  
790 excitation, and inhibition in cat primary visual cortex. *J. Neurophysiol.* **84**, 909–926  
791 (2000).
- 792 2. Wehr, M. & Zador, A. M. Balanced inhibition underlies tuning and sharpens spike timing  
793 in auditory cortex. *Nature* **426**, 442–446 (2003).
- 794 3. Okun, M. & Lampl, I. Instantaneous correlation of excitation and inhibition during ongoing  
795 and sensory-evoked activities. *Nat. Neurosci.* **11**, 535–7 (2008).
- 796 4. Atallah, B. V & Scanziani, M. Instantaneous Modulation of Gamma Oscillation Frequency

- 797 by Balancing Excitation with Inhibition. *Neuron* **62**, 566–577 (2009).
- 798 5. Okun, M. & Lampl, I. Balance of excitation and inhibition. *Scholarpedia* **4**, 7467 (2009).
- 799 6. Yizhar, O. *et al.* Neocortical excitation/inhibition balance in information processing and  
800 social dysfunction. *Nature* **477**, 171–178 (2011).
- 801 7. Isaacson, J. S. & Scanziani, M. How inhibition shapes cortical activity. *Neuron* **72**, 231–  
802 243 (2011).
- 803 8. Silver, R. A. Neuronal arithmetic. **11**, (2010).
- 804 9. Chance, F. S., Abbott, L. F. & Reyes, A. D. Gain modulation from background synaptic  
805 input. *Neuron* **35**, 773–782 (2002).
- 806 10. Reynolds, J. H. & Heeger, D. J. The Normalization Model of Attention. *Neuron* **61**, 168–  
807 185 (2009).
- 808 11. Zhang, L. I., Tan, A. Y. Y., Schreiner, C. E. & Merzenich, M. M. Topography and synaptic  
809 shaping of direction selectivity in primary auditory cortex. *Nature* **424**, 201–205 (2003).
- 810 12. Zhou, M. *et al.* Scaling down of balanced excitation and inhibition by active behavioral  
811 states in auditory cortex. *Nat. Neurosci.* **17**, 841–850 (2014).
- 812 13. Wilent, W. B. & Contreras, D. Dynamics of excitation and inhibition underlying stimulus  
813 selectivity in rat somatosensory cortex. *Nat. Neurosci.* **8**, 1364–1370 (2005).
- 814 14. Shu, Y., Hasenstaub, A., Badoual, M., Bal, T. & McCormick, D. A. Barrages of Synaptic  
815 Activity Control the Gain and Sensitivity of Cortical Neurons. *J. Neurosci.* **23**, (2003).
- 816 15. Haider, B., Duque, A., Hasenstaub, A. R. & McCormick, D. A. Neocortical Network  
817 Activity In Vivo Is Generated through a Dynamic Balance of Excitation and Inhibition. *J.*  
818 *Neurosci.* **26**, (2006).
- 819 16. Denève, S. & Machens, C. K. Efficient codes and balanced networks. *Nat. Neurosci.* **19**,  
820 375–82 (2016).
- 821 17. Vogels, T. P. & Abbott, L. F. Gating multiple signals through detailed balance of excitation

- 822 and inhibition in spiking networks. *Nat. Neurosci.* **12**, 483–91 (2009).
- 823 18. van Vreeswijk, C. & Sompolinsky, H. Chaos in neuronal networks with balanced  
824 excitatory and inhibitory activity. *Science* **274**, 1724–6 (1996).
- 825 19. Shadlen, M. N. & Newsome, W. T. The variable discharge of cortical neurons:  
826 implications for connectivity, computation, and information coding. *J. Neurosci.* **18**, 3870–  
827 96 (1998).
- 828 20. Kremkow, J., Aertsen, A. & Kumar, A. Gating of Signal Propagation in Spiking Neural  
829 Networks by Balanced and Correlated Excitation and Inhibition. *J. Neurosci.* **30**, 15760–  
830 15768 (2010).
- 831 21. Hennequin, G., Agnes, E. J. & Vogels, T. P. Inhibitory Plasticity: Balance, Control, and  
832 Codependence. *Annu. Rev. Neurosci.* **40**, annurev-neuro-072116-031005 (2017).
- 833 22. Ishizuka, N., Cowan, W. M. & Amaral, D. G. A quantitative analysis of the dendritic  
834 organization of pyramidal cells in the rat hippocampus. *J Comp Neurol* **362**, 17–45  
835 (1995).
- 836 23. Magee, J. C. & Cook, E. P. Somatic EPSP amplitude is independent of synapse location  
837 in hippocampal pyramidal neurons. *Nat. Neurosci.* **3**, 895–903 (2000).
- 838 24. Ishizuka, N., Weber, J. & Amaral, D. G. Organization of intrahippocampal projections  
839 originating from CA3 pyramidal cells in the rat. *J. Comp. Neurol.* **295**, 580–623 (1990).
- 840 25. Cash, S. & Yuste, R. Linear summation of excitatory inputs by CA1 pyramidal neurons.  
841 *Neuron* **22**, 383–394 (1999).
- 842 26. Lovett-Barron, M. *et al.* Regulation of neuronal input transformations by tunable dendritic  
843 inhibition. *Nat. Neurosci.* **15**, 423–30, S1-3 (2012).
- 844 27. Poirazi, P., Brannon, T. & Mel, B. W. Arithmetic of Subthreshold Synaptic Summation in a  
845 Model CA1 Pyramidal Cell. *Neuron* **37**, 977–987 (2003).
- 846 28. Carandini, M. & Heeger, D. Normalization as a canonical neural computation. *Nat. Rev.*



- 847            *Neurosci.* 1–12 (2012). doi:10.1038/nrn3136
- 848    29.    Heiss, J. E., Katz, Y., Ganmor, E. & Lampl, I. Shift in the Balance between Excitation and  
849            Inhibition during Sensory Adaptation of S1 Neurons. *J. Neurosci.* **28**, 13320–13330  
850            (2008).
- 851    30.    Shannon, C. E. A Mathematical Theory of Communication. *Bell Syst. Tech. J.* **27**, 379–  
852            423 (1948).
- 853    31.    Vogels, T. P., Sprekeler, H., Zenke, F., Clopath, C. & Gerstner, W. Inhibitory plasticity  
854            balances excitation and inhibition in sensory pathways and memory networks. *Science*  
855            **334**, 1569–73 (2011).
- 856    32.    Luz, Y. & Shamir, M. Balancing feed-forward excitation and inhibition via hebbian  
857            inhibitory synaptic plasticity. *PLoS Comput. Biol.* **8**, (2012).
- 858    33.    D'amour, J. A. & Froemke, R. C. Inhibitory and Excitatory Spike-Timing-Dependent  
859            Plasticity in the Auditory Cortex. *Neuron* **86**, 514–528 (2015).
- 860    34.    Xue, M., Atallah, B. V. & Scanziani, M. Equalizing excitation–inhibition ratios across  
861            visual cortical neurons. *Nature* **511**, 596–600 (2014).
- 862    35.    Barron, H. C., Vogels, T. P., Behrens, T. E. & Ramaswami, M. Inhibitory engrams in  
863            perception and memory. *Proc. Natl. Acad. Sci.* **114**, 201701812 (2017).
- 864    36.    Lee, D., Lin, B.-J. & Lee, A. K. Hippocampal Place Fields Emerge upon Single-Cell  
865            Manipulation of Excitability During Behavior. *Science (80-. )*. **337**, 849–853 (2012).
- 866    37.    Bittner, K. C. *et al.* Conjunctive input processing drives feature selectivity in hippocampal  
867            CA1 neurons. *Nat. Neurosci.* **18**, 1133–1142 (2015).
- 868    38.    Bittner, K. C., Milstein, A. D., Grienberger, C., Romani, S. & Magee, J. C. Behavioral time  
869            scale synaptic plasticity underlies CA1 place fields. *Science (80-. )*. **357**, 1033–1036  
870            (2017).
- 871    39.    Grienberger, C., Milstein, A. D., Bittner, K. C., Romani, S. & Magee, J. C. Inhibitory  
872            suppression of heterogeneously tuned excitation enhances spatial coding in CA1 place

- 873 cells. *Nat. Neurosci.* **20**, 417–426 (2017).
- 874 40. Pouille, F. & Scanziani, M. Enforcement of temporal fidelity in pyramidal cells by feed-  
875 forward somatic inhibition. *Science (80-. )*. **293**, 325–331 (2001).
- 876 41. Higley, M. J. & Contreras, D. Balanced Excitation and Inhibition Determine Spike Timing  
877 during Frequency Adaptation. *J. Neurosci.* **26**, 448–457 (2006).
- 878 42. Panzeri, S., Petersen, R. S., Schultz, S. R., Lebedev, M. & Diamond, M. E. The role of  
879 spike timing in the coding of stimulus location in rat somatosensory cortex. *Neuron* **29**,  
880 769–777 (2001).
- 881 43. Jensen, O. & Lisman, J. E. Position Reconstruction From an Ensemble of Hippocampal  
882 Place Cells: Contribution of Theta Phase Coding. *J. Neurophysiol.* **83**, 2602–2609 (2000).
- 883 44. Gabernet, L., Jadhav, S. P., Feldman, D. E., Carandini, M. & Scanziani, M.  
884 Somatosensory integration controlled by dynamic thalamocortical feed-forward inhibition.  
885 *Neuron* **48**, 315–327 (2005).
- 886 45. Ahmed, O. J. & Mehta, M. R. The hippocampal rate code: anatomy, physiology and  
887 theory. *Trends in Neurosciences* **32**, 329–338 (2009).
- 888 46. Pouille, F., Marin-Burgin, A., Adesnik, H., Atallah, B. V. & Scanziani, M. Input  
889 normalization by global feedforward inhibition expands cortical dynamic range. *Nat.*  
890 *Neurosci.* **12**, 1577–85 (2009).
- 891 47. Bruno, R. M. Synchrony in sensation. *Current Opinion in Neurobiology* **21**, 701–708  
892 (2011).
- 893 48. Froemke, R. C. Plasticity of Cortical Excitatory-Inhibitory Balance. *Annu. Rev. Neurosci.*  
894 **38**, 195–219 (2015).
- 895 49. Froemke, R. C., Merzenich, M. M. & Schreiner, C. E. A synaptic memory trace for cortical  
896 receptive field plasticity. *Nature* **450**, 425–429 (2007).
- 897 50. Klyachko, V. A. *et al.* Excitatory and Feed-Forward Inhibitory Hippocampal Synapses  
898 Work Synergistically as an Adaptive Filter of Natural Spike Trains. *PLoS Biol.* **4**, e207

- 899 (2006).
- 900 51. Bartley, A. F. & Dobrunz, L. E. Short-term plasticity regulates the excitation/inhibition ratio  
901 and the temporal window for spike integration in CA1 pyramidal cells. *Eur. J. Neurosci.*  
902 **41**, 1402–1415 (2015).
- 903 52. Tsodyks, M. V. & Markram, H. The neural code between neocortical pyramidal neurons  
904 depends on neurotransmitter release probability. *Proc. Natl. Acad. Sci.* **94**, 719–723  
905 (1997).
- 906 53. Basu, J. *et al.* Gating of hippocampal activity, plasticity, and memory by entorhinal cortex  
907 long-range inhibition. *Science (80-. )*. **351**, aaa5694-aaa5694 (2016).
- 908 54. Kim, H., Ährlund-Richter, S., Wang, X., Deisseroth, K. & Carlén, M. Prefrontal  
909 Parvalbumin Neurons in Control of Attention. *Cell* **164**, 208–218 (2016).
- 910 55. Murthy, V. N., Sejnowski, T. J. & Stevens, C. F. Heterogeneous release properties of  
911 visualized individual hippocampal synapses. *Neuron* **18**, 599–612 (1997).
- 912
